# Supplementary material for: Unusual electroluminescence from n-ZnO@i-MgO core–shell nanowire color-tunable light-emitting diode at reverse bias
Source: Royal Society of Chemistry journal article supplement (doi:10.1039/c3cp55505d), 2014-01-01
Supplement: c3cp55505d1.pdf [file c3cp55505d1.pdf]

## Electronic Supporting Information

# **Unusual electroluminescence from n-ZnO@i-MgO core-shell nanowire color-tunable light-emitting diode at reverse bias**

Xiaoming Mo, Guojia Fang,\* Hao Long, Songzhan Li, Haoning Wang, Zhao Chen,  
Huihui Huang, Wei Zeng, Yupeng Zhang and Chunxu Pan

School of Physics and Technology, Key Lab of Artificial Micro- and Nano-Structures  
of Ministry of Education, Wuhan University, Wuhan 430072, People's Republic of  
China.

E-mail: [gjfang@whu.edu.cn](mailto:gjfang@whu.edu.cn)

Fax: +86 (0)27 68752569; Tel: +86 (0)27 68752147

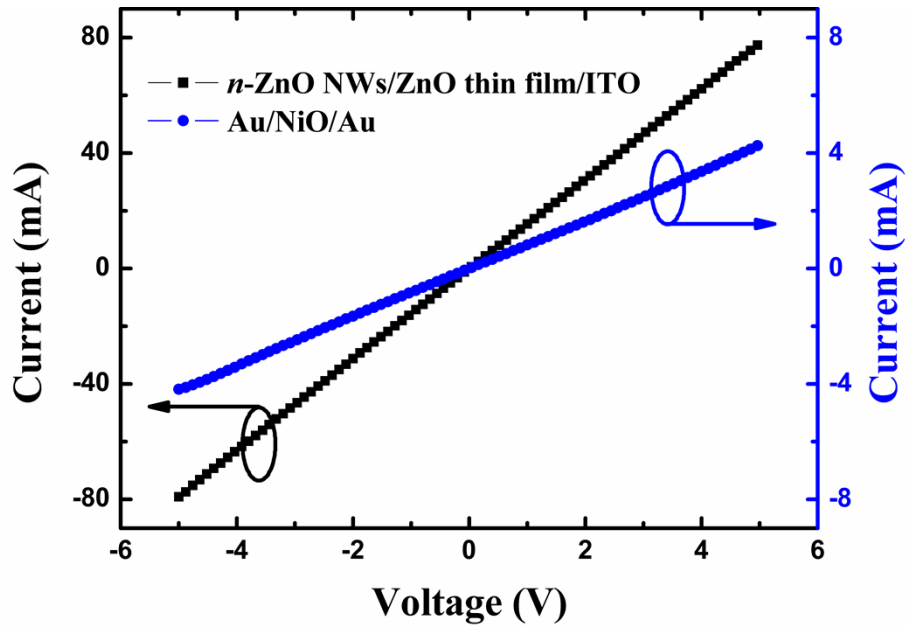

**Fig. S1** I-V curves of *n*-ZnO NWs/ZnO thin film/ITO and Au/NiO/Au. The both ohmic behaviors indicate that no potential barrier heights are existent in the *n*-ZnO NWs/ZnO thin film/ITO and Au/NiO interfaces. Therefore, it is confirmed that the rectification characteristic originates from the p-NiO/i-MgO/*n*-ZnO heterojunctions.
